# Supplementary material for: Effect of rice straw and swine manure biochar on N2O emission from paddy soil
Source: PubMed Central journal article supplement (PMC7331641; doi:10.1038/s41598-020-67705-z), 2020-07-02
Supplement: 41598_2020_67705_MOESM1_ESM.pdf [file 41598_2020_67705_MOESM1_ESM.pdf]

# **Effect of rice straw and swine manure biochar on N<sub>2</sub>O emission from paddy soil**

**Zhanbiao Yang<sup>1a\*</sup>, Yi Yu<sup>1a</sup>, Rujing Hu<sup>1</sup>, Xiaoxun Xu<sup>1</sup>, Junren Xian<sup>1</sup>, Yuanxiang Yang<sup>1</sup>, Lixia Liu<sup>2</sup>, Zhang Cheng<sup>1\*</sup>**

<sup>1</sup> College of Environment, Sichuan Agricultural University, Chengdu 611130, China.

<sup>2</sup> College of Veterinary Medicine, Sichuan Agricultural University, Chengdu, 611130 Sichuan, China.

<sup>a</sup> These authors contributed equally to this work.

\*email: [zyb195@126.com](mailto:zyb195@126.com); [chengzhang2001@foxmail.com](mailto:chengzhang2001@foxmail.com)

**Table S1.** The physicochemical properties of biochars

|                    | Unit                            | RSBC             | SMBC             |
|--------------------|---------------------------------|------------------|------------------|
| pH                 | /                               | 10.173 ± 0.16 a  | 9.976 ± 0.03 a   |
| Ash                | %                               | 39.916 ± 1.52 b  | 59.927 ± 1.61 a  |
| CEC                | cmol kg <sup>-1</sup>           | 128.287 ± 4.27 b | 137.793 ± 3.57 a |
| C                  | %                               | 32.893 ± 0.81 b  | 43.807 ± 1.28 a  |
| N                  | %                               | 0.940 ± 0.02 b   | 1.513 ± 0.07 a   |
| H                  | %                               | 0.705 ± 0.01b    | 1.305 ± 0.04 a   |
| S                  | %                               | 0.375 ± 0.02 a   | 0.289 ± 0.03 b   |
| C/N                | /                               | 35.274 ± 0.51 a  | 28.553 ± 0.74 b  |
| C/H                | /                               | 46.255 ± 0.94 b  | 32.934 ± 0.65 b  |
| S <sub>BET</sub>   | m <sup>2</sup> g <sup>-1</sup>  | 301.821          | 187.539          |
| V <sub>total</sub> | cm <sup>3</sup> g <sup>-1</sup> | 0.084            | 0.038            |

RSBC: rice straw biochar; SWBC: swine manure biochar; CEC: cation exchange capacity; S<sub>BET</sub>: surface area; V<sub>total</sub>: total pore volume. Different lowercase letters above the row indicate a significant difference between RSBC and SMBC at  $p < 0.05$ .

**Table S2.** Two-way *ANOVA* of biochars type and rate on soil properties and N<sub>2</sub>O emission

| Stage            | Items                            | Biochar |                  |     | Rate     |                  |     | Biochar × Rate |                  |     |
|------------------|----------------------------------|---------|------------------|-----|----------|------------------|-----|----------------|------------------|-----|
|                  |                                  | F       | <i>p</i>         |     | F        | <i>p</i>         |     | F              | <i>p</i>         |     |
| Elongation stage |                                  |         |                  |     |          |                  |     |                |                  |     |
|                  | pH                               | 100.841 | <i>p</i> < 0.001 | *** | 124.939  | <i>p</i> < 0.001 | *** | 22.866         | <i>p</i> < 0.001 | *** |
|                  | NH <sub>4</sub> <sup>+</sup>     | 2.537   | <i>p</i> = 0.119 | ns  | 147.047  | <i>p</i> < 0.001 | *** | .246           | <i>p</i> = 0.622 | ns  |
|                  | NO <sub>3</sub> <sup>-</sup>     | 11.203  | <i>p</i> = 0.002 | **  | 4.558    | <i>p</i> = 0.047 | *   | 1.996          | <i>p</i> = 0.165 | ns  |
|                  | NO <sub>2</sub> <sup>-</sup>     | 16.137  | <i>p</i> < 0.001 | *** | 271.991  | <i>p</i> < 0.001 | *** | 113.940        | <i>p</i> < 0.001 | *** |
|                  | SOC                              | 69.158  | <i>p</i> < 0.001 | *** | 418.617  | <i>p</i> < 0.001 | *** | 30.253         | <i>p</i> < 0.001 | *** |
|                  | SOC:NO <sub>3</sub> <sup>-</sup> | 6.520   | <i>p</i> = 0.015 | **  | 175.817  | <i>p</i> < 0.001 | *** | 35.937         | <i>p</i> < 0.001 | *** |
|                  | UR                               | .716    | <i>p</i> = 0.402 | ns  | 23.383   | <i>p</i> < 0.001 | *** | 1.368          | <i>p</i> = 0.249 | ns  |
|                  | NR                               | 2.279   | <i>p</i> = 0.139 | ns  | 3010.410 | <i>p</i> < 0.001 | *** | 30.335         | <i>p</i> < 0.001 | *** |
| Heading stage    |                                  |         |                  |     |          |                  |     |                |                  |     |
|                  | pH                               | 74.418  | <i>p</i> < 0.001 | *** | 21.775   | <i>p</i> < 0.001 | *** | 3.281          | <i>p</i> = 0.078 | ns  |
|                  | NH <sub>4</sub> <sup>+</sup>     | 6.317   | <i>p</i> = 0.016 | **  | 93.797   | <i>p</i> < 0.001 | *** | 8.854          | <i>p</i> = 0.005 | **  |
|                  | NO <sub>3</sub> <sup>-</sup>     | 14.724  | <i>p</i> < 0.001 | *** | 10.355   | <i>p</i> = 0.003 | **  | 4.561          | <i>p</i> = 0.039 | *   |
|                  | NO <sub>2</sub> <sup>-</sup>     | 166.996 | <i>p</i> < 0.001 | *** | 115.136  | <i>p</i> < 0.001 | *** | 0.500          | <i>p</i> = 0.484 | ns  |
|                  | SOC                              | 10.639  | <i>p</i> = 0.002 | **  | 256.449  | <i>p</i> < 0.001 | *** | 30.137         | <i>p</i> < 0.001 | *** |
|                  | SOC:NO <sub>3</sub> <sup>-</sup> | 24.156  | <i>p</i> < 0.001 | *** | 111.374  | <i>p</i> < 0.001 | *** | 32.289         | <i>p</i> < 0.001 | *** |
|                  | UR                               | 0.401   | <i>p</i> = 0.530 | ns  | 74.836   | <i>p</i> < 0.001 | *** | 5.950          | <i>p</i> = 0.019 | *   |
|                  | NR                               | 34.592  | <i>p</i> < 0.001 | *** | 126.955  | <i>p</i> < 0.001 | *** | 12.870         | <i>p</i> = 0.001 | **  |
| Mature stage     |                                  |         |                  |     |          |                  |     |                |                  |     |
|                  | pH                               | 34.267  | <i>p</i> < 0.001 | *** | 47.641   | <i>p</i> < 0.001 | *** | 10.226         | <i>p</i> = 0.003 | **  |
|                  | NH <sub>4</sub> <sup>+</sup>     | 7.269   | <i>p</i> = 0.010 | *   | 10.362   | <i>p</i> = 0.003 | **  | 4.723          | <i>p</i> = 0.036 | *   |
|                  | NO <sub>3</sub> <sup>-</sup>     | 23.378  | <i>p</i> < 0.001 | *** | 283.035  | <i>p</i> < 0.001 | *** | 78.103         | <i>p</i> < 0.001 | *** |
|                  | NO <sub>2</sub> <sup>-</sup>     | 106.843 | <i>p</i> < 0.001 | *** | 86.636   | <i>p</i> < 0.001 | *** | 42.897         | <i>p</i> < 0.001 | *** |
|                  | SOC                              | 0.004   | <i>p</i> = 0.952 | ns  | 160.970  | <i>p</i> < 0.001 | *** | 0.603          | <i>p</i> = 0.442 | ns  |
|                  | SOC:NO <sub>3</sub> <sup>-</sup> | 6.622   | <i>p</i> = 0.014 | *   | 14.073   | <i>p</i> = 0.001 | **  | 15.796         | <i>p</i> < 0.001 | *** |
|                  | UR                               | 4.949   | <i>p</i> = 0.051 | ns  | 1.978    | <i>p</i> = 0.178 | ns  | 0.289          | <i>p</i> = 0.490 | ns  |
|                  | NR                               | 1.407   | <i>p</i> = 0.141 | ns  | 2.380    | <i>p</i> = 0.116 | ns  | 0.659          | <i>p</i> = 0.280 | ns  |

Note: \* *p* < 0.05, \*\* *p* < 0.01, \*\*\* *p* < 0.001, ns not significant.
